# Supplementary material for: Genetic Association with ERAP1 in Psoriasis Is Confined to Disease Onset after Puberty and Not Dependent on HLA-C*06
Source: PubMed Central journal article supplement — J Invest Dermatol. 2012 Aug 30;133(2):411–7. doi: 10.1038/jid.2012.280 (PMC3547223; doi:10.1038/jid.2012.280), 2012-08-30

**Supplementary Table 1. Interaction results between *ERAPI* SNPs and *HLA-C\*06* in all subjects.**

| Markers          | Additive |                   | Multiplicative |                  |
|------------------|----------|-------------------|----------------|------------------|
|                  | APp      | AP (AP 95%)       | P              | OR (CI 95%)      |
| rs26653/HLA-C*06 | 0.60     | 0.08 (-0.21-0.37) | 0.34           | 0.83 (0.57-1.22) |
| rs30187/HLA-C*06 | 0.80     | 0.04 (-0.28-0.36) | 0.88           | 1.39 (0.65-1.43) |
| rs27524/HLA-C*06 | 0.43     | 0.12 (-0.18-0.41) | 0.89           | 6.21 (0.70-1.52) |

Calculating biological interaction in R using the generalized linear model with binominal link. Created interaction variables and attributable proportion (AP) with 95% CI. A new matrix was created with measures of interaction IM (AP, AP.95 Low, AP.95 High, APp).

AP= attributable proportion

**Supplementary Table 2. Genotypic effect of marker.**

| <b>Marker</b>   | <b>rs26653</b>   | <b>rs30187</b>   | <b>rs27524</b>   | <b>Cw06</b>       | <b>rs10484554</b> |
|-----------------|------------------|------------------|------------------|-------------------|-------------------|
| <b>Genotype</b> | <b>OR (CI)</b>   | <b>OR (CI)</b>   | <b>OR (CI)</b>   | <b>OR (CI)</b>    | <b>OR (CI)</b>    |
| AA              | 1.00             | 1.00             | 1.00             | 1.00              | 1.00              |
| Aa              | 1.30 (1.09-1.53) | 1.15 (0.97-1.36) | 1.06 (0.89-1.26) | 5.76 (4.74-7.00)  | 4.58 (3.82-5.50)  |
| aa              | 1.71 (1.28-2.30) | 1.38 (1.07-1.77) | 1.26 (0.98-1.61) | 6.96 (3.42-14.19) | 5.46 (3.28-9.10)  |
| Effect          | Additive         | Additive         | Recessive        | Dominant          | Dominant          |

AA= Homozygote for major allele  
Aa= Heterozygote  
aa= Homozygote for minor allele

**Supplementary Figure 1. Association of *ERAPI* SNP rs26653 stratified by phenotype.**  
*ERAPI* SNP rs26653 stratified in four different age groups and into plaque and guttate phenotype.

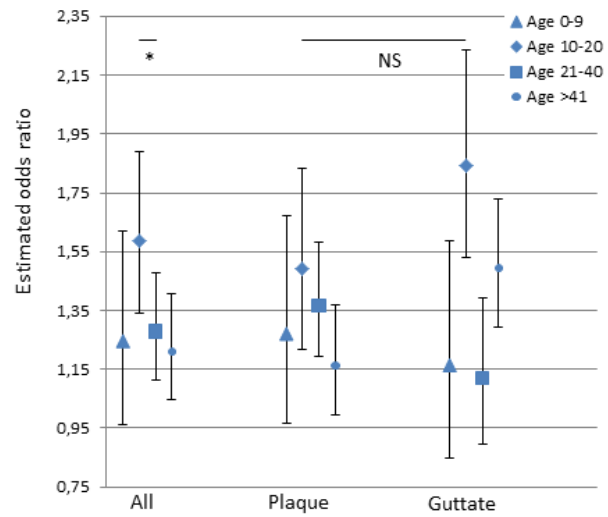

Supplement: jid2012280x1.pdf [file jid2012280x1.pdf]
